# Supplementary material for: Intramolecular radical hydrosilylation — the first radical 5-endo-dig cyclisationElectronic supplementary information (ESI) available: experimental data. See http://www.rsc.org/suppdata/cc/b2/b204879e/
Source: Royal Society of Chemistry journal article supplement (doi:10.1039/b204879e), 2002-06-24
Supplement: b204879e.doc [file b204879e.doc]

Supplementary data

Intramolecular radical hydrosilylation – the first radical

5-*endo-dig* cyclisation

*Stephan Amrein and Armido Studer**

*Fachbereich Chemie der Philipps-Universität*

*D-35032 Marburg, Germany*

**Experimental**

**General.** 1H NMR and 13C NMR spectra: recorded on a *Bruker* AMX 500, AMX 400, AC 300 or a *Varian Gemini* 300. Chemical shifts ** in ppm rel. to SiMe4 as internal standard. TLC: *Merck* silica gel *60* F254 plates; detection with UV or dipping into a soln. of KMnO4 (1.5 g in 333 ml 1m NaOH) or a soln. of Ce(SO4)2**.**H2O (10 g), phosphormolybdic acid hydrate (25 g), conc. H2SO4 (60 ml), and H2O (940 ml), followed by heating. FC: *Merck* or *Fluka* silica gel *60* (40 – 63 m); at *ca.* 0.4 bar. GC: *Hewlett Packard* 5890chromatograph using *Hewlett* *Packard* HP-5 or *Supelco* -DEX 120 columns. Melting points: *Büchi* 510 apparatus; uncorrected. IR spectra were recorded on a *Perkin Elmer* 782 or *Bruker* IFS-200 spectrophotometer. Solvents were purified by standard methods. Air and moisture sensitive compounds were handled under argon using Schlenk techniques.

3-*tert*-Butyldimethylsilyl-2,4-dimethoxy-3-methyl-1,4-cyclohexadiene (**1**) was prepared as described previously.1

**3-[(Diethylamino)dimethylsilyl]-2,4-dimethoxy-3-methyl-1,4-cyclohexadiene** **(4)**. 1,5-Dimethoxy-1,4-cyclohexadiene2 (4.20 g, 30 mmol) was dissolved in THF (100 ml). The soln. was cooled to *ca.* –78 °C. After addition of *tert-*butyllithium (22.3 ml, 1.48m in hexane, 33 mmol) and stirring for 30 min, HMPA (5.77 ml, 33 mmol) was added. The resulting red soln. was stirred for 1 h at –78 °C. (Diethylamino)dimethylchlorosilane3 (5.46 g, 33 mmol) was slowly added. The soln. was stirred at –78 °C for 1 h. Butyllithium (20.5 ml, 1.61m in pentane, 33 mmol) was added. After stirring for another 60 min at the same temperature (CH3O)2SO2 (2.85 ml, 30 mmol) was added. The cooling bath was removed and the reaction mixture was allowed to warm to RT. Pentane was added, followed by H2O. The phases were separated and the organic layer was additionally washed with H2O and brine. The organic layer was dried over MgSO4. Distillation (80 °C at 1 mbar) afforded **4** (7.63 g, 90%) as a colorless oil. IR (nujol): 2964*s*, 2904*s*, 2868*m*, 2829*s*, 1678*s*, 1345*m*, 1248*m*, 1211*s*, 1177*m*, 1127*s*, 1031*m*, 811*s*, 766*m* cm-1. 1H-NMR (300 MHz, CDCl3): ** = 4.52 (*t*, *J* = 3.4 Hz, 2 H, CH); 3.51 (*s*, 6 H, OCH3); 2.87 (*dd*, 2 H, *J1* = *J2* = 3.4 Hz, C=CH-C*H*2); 2.81 (*q, J* = 7.0 Hz, 4 H, NCH2); 1.32 (*s*, 3 H, CH3); 0.99 (*t*, *J* = 7.0 Hz, 6 H, NCH2C*H*3); 0.12 (*s*, 6 H, Si(CH3)2). 13C-NMR (75 MHz, CDCl3): ** = 158.7 (C), 88.2 (CH), 53.9 (CH3), 41.0 (CH2), 38.5(C), 24.5 (CH2), 17.3 (CH3), 16.3 (CH3), –2.7 (CH3). MS (EI): 283 (2, [M]+), 268 (4), 197 (9), 152 (22), 132 (47), 131 (69), 130 (100), 117 (15), 116 (84), 103 (37), 88 (19), 73 (20), 72 (31), 70 (24), 59 (58), 58 (32), 57 (12). HRMS (EI) calcd. for C15H29NO2Si (M+) 283.1968, found 283.1965.

**Synthesis of Silylethers 5-8, and 14. General Procedure 1 (GP 1).** Dichloromethane was cooled to 0 °C and treated with Aminosilane **4** and unsaturated alcohol. Methyl trifluorsulfonate was added dropwise. After stirring at 0 °C for 30 min, the reaction mixture was treated with pentane, followed by H2O. The phases were separated and the organic layer was additionally washed with H2O. The organic layer was dried over MgSO4. The solvent was removed *in vacuo* at RT and the crude product was purified by FC. The silica gel was pretreated with 1% Et3N.

**3-(Allyloxydimethylsilyl)-2,4-dimethoxy-3-methyl-1,4-cyclohexadiene (5).** Ac­cording to *GP 1* with dichloromethane (7.5 ml), aminosilane **4** (0.96 ml, 3.3 mmol), allylic alcohol (0.23 ml, 3.3 mmol), and methyl trifluorsulfonate (0.37 ml, 3.3 mmol). FC (pentane/diethyl ether, 50:1) afforded **5** (620 mg, 70%) as a colorless oil. IR (nujol): 2938*w*, 2904*w*, 2830*w*, 1681*m*, 1251*m*, 1211*s*, 1128*s*, 1077*w*, 851*m*, 822*w*, 784*w*, 768*w* cm-1. 1H-NMR (200 MHz, CDCl3): ** = 5.99–5.81 (*m*, 1 H, C*H*=CH2); 5.23 (*dq*, 2 H, *J1* = 17.0 Hz, *J2* = 1.9 Hz, 1 H, CH=C*H*2); 5.05 (*dq*, 2 H, *J1* = 10.3 Hz, *J2* = 1.8 Hz, CH=C*H*2); 4.57 (*t*, *J* = 3.6 Hz, 2 H, C=C*H*-CH2); 4.14 (*dt*, *J1* = 4.5 Hz, *J2* = 1.8 Hz, 2 H, OCH2); 3.50 (*s*, 6 H, OCH3); 2.84 (*t*, *J* = 3.6 Hz, 2 H, C=CH-C*H*2); 1.34 (*s*, 3 H, C-CH3); 0.11 (*s*, 6 H, Si(CH3)2). 13C-NMR (75 MHz, CDCl3): ** = 157.4 (C), 137.7 (CH), 113.8 (CH2), 89.1 (CH), 64.3 (CH2), 54.1 (CH3), 34.2 (C), 24.4 (CH2), 16.7 (CH3), –3.1 (CH3). MS (EI): 268 (30, [M]+), 267 (18), 154 (15), 153 (34), 152 (43), 123 (20), 122 (100), 121 (41), 115 (72), 107 (41), 99 (15), 91 (39), 89 (28), 85 (34), 77 (12), 75 (29), 59 (19), 41 (25). HRMS (EI) calcd. for C14H24O3Si (M+) 268.1495, found 268.1498.

**3-((3-Buten-2-yloxy)dimethylsilyl)-2,4-dimethoxy-3-methyl-1,4-cyclohexadiene (6).** According to *GP 1* with dichloromethane (7.5 ml), aminosilane **4** (0.96 ml, 3.3 mmol), 3-buten-2-ol (238 mg, 3.3 mmol) and methyl trifluorsulfonate (0.36 ml, 3.3 mmol) for 20 min. at 0 °C. FC (pentane/diethyl ether, 50:1) afforded **6** (487 mg, 53%) as a colorless oil. IR (nujol): 2970*m*, 1681*m*, 1595*m*, 1475*m*, 1254*s*, 1211*s*, 1128*s*, 1090*m*, 1031*m*, 861*m*, 811*m*, 783*m*, 767*m* cm-1. 1H-NMR (200 MHz, CDCl3): ** = 5.85 (*ddd*, *J1* = 17.2 Hz, *J2* = 10.5 Hz, *J3* = 5.0 Hz, 1 H, CH2=C*H*); 5.13 (*dt*, *J1* = 17.3 Hz, *J2* = 1.7 Hz, 1 H, C*H*2=CH); 4.96 (*dt*, *J1* = 10.7 Hz, *J2* = 1.6 Hz, 1 H, C*H*2=CH); 4.56 (*t*, *J* = 3.6 Hz, 2 H, C=CH); 4.36–4.22 (*m*, 1 H, OCH); 3.50 (*s*, 3 H, OCH3); 3.49 (*s*, 3 H, OCH3); 2.83 (*t*, *J* = 3.8 Hz, 2 H, C=CH–C*H*2); 1.35 (*s*, 3 H, C–CH3); 1.21 (*d*, *J* = 6.5 Hz, 3 H, CH–C*H*3); 0.11 (*s*, 3 H, Si–CH3); 0.08 (*s*, 3 H, Si–CH3). 13C-NMR (75 MHz, CDCl3): ** = 157.6 (C), 143.0 (CH), 112.1 (CH2), 89.0 (CH), 69.7 (CH), 54.0 (CH3), 37.8 (C), 24.4 (CH2), 23.9 (CH3), 16.6 (CH3), –2.1 (CH3), –2.7 (CH3). MS (EI): 282 (15, [M]+), 195 (9), 153 (13), 152 (36), 149 (14), 129 (50), 123 (10), 122 (34), 121 (15), 107 (59), 91 (15), 89 (14), 77 (11), 75 (100), 55 (15). HRMS (EI) calcd for C15H26O3Si (M+): 282.1651, found: 282.1654.

**3-((3-Penten-2-yloxy)dimethylsilyl)-2,4-dimethoxy-3-methyl-1,4-cyclohexadiene (7).** According to *GP 1* with dichloromethane (5 ml), aminosilane **4** (0.64 ml, 2.2 mmol), methyl trifluorsulfonate (0.25 ml, 2.2 mmol) and 3-penten-2-ol4 (0.23 ml, 2.2 mmol) for 1.5 h at –5 °C. FC (pentane/diethyl ether, 50 : 1) afforded **7** (418 mg, 64%) as a colorless oil. IR (nujol): 3443*br w*, 2965*m*, 1595*m*, 1475*m*, 1255*s*, 1128*s*, 1077*m*, 1049*m*, 1006*w*, 967*w*, 840*w*, 801*w* cm-1. 1H-NMR (200 MHz, CDCl3): ** = 5.58–5.46 (*m*, 2 H, CH=CH); 4.56 (*t*, *J* = 3.6 Hz, 2 H, C=CH); 4.31–4.19 (*m*, 1 H, OCH); 3.50 (*s*, 3 H, OCH3); 3.49 (*s*, 3 H, CH3); 2.83 (*t, J* = 3.6 Hz, 2 H, CH2); 1.68–1.64 (*m*, 3 H, CH=CH–C*H*3); 1.34 (*s*, 3 H, C–CH3); 1.18 (*d, J* = 6.2 Hz, 3 H, OCH–C*H*3); 0.10 (*s*, 3 H, Si–CH3); 0.08 (*s*, 3 H, Si–CH3). 13C-NMR (75 MHz, CDCl3): ** = 141.9 (C), 136.1 (CH), 123.3 (CH), 89.0 (CH), 69.5 (CH), 54.0 (CH3), 24.4 (CH2), 24.2 (CH3), 17.5 (C), 16.7 (CH3), –1.9 (CH3), –2.5 (CH3). MS (EI): 296 (12, [M]+); 153 (13), 152 (22), 149 (13), 143 (10), 122 (23), 121 (11), 107 (23), 91 (15), 89 (10), 77 (12), 75 (100), 69 (52), 57 (12), 41 (11). HRMS (EI) calcd. for C16H28O3Si (M+) 296.1808, found 296.1801.

**3-((2-Methyl-1-buten-3-yloxy)dimethylsilyl)-2,4-dimethoxy-3-methyl-1,4-cyclohexadiene (8).** According to *GP 1* with dichloromethane (5 ml), aminosilane **4** (0.64 ml, 2.2 mmol), methyl trifluorsulfonate (0.24 ml, 2.2 mmol) and 3-methylbut-3-en-2-ol5 (189 mg, 2.2 mmol) for 25 min. at 0 °C. FC (pentane/diethyl ether, 200 : 1) afforded **8** (208 mg, 32%) as a colorless oil. IR (nujol): 2974*m*, 2831*w*, 1681*m*, 1595*m*, 1474*m*, 1254*m*, 1212*m*, 1128*s*, 1091*m*, 1061*m*, 846*m*, 767*m* cm-1. 1H-NMR (200 MHz, CDCl3): ** = 4.88–4.85 (*m*, 1 H, C=CH2); 4.70–4.66 (*m*, 1 H, C=CH2); 4.56 (*t, J* = 3.8 Hz, 2 H, C=CH); 4.20 (*q, J* = 6.3 Hz, 1 H, OCH); 3.50 (*s,* 3 H, OCH3); 3.49 (*s*, 3 H, OCH3); 2.83 (*t*, *J* = 3.6 Hz, 2 H, CH2); 1.68 (*s*, 3 H, Si–C–CH3); 1.34 (*s*, 3 H, C–CH3); 1.20 (*d, J* = 6.2 Hz, 3 H, CH–C*H*3); 0.08 (*s*, 3 H, Si(CH3)); 0.06 (*s*, 3 H, Si(CH3)). 13C-NMR (75 MHz, CDCl3): ** = 157.6 (C), 149.5 (C), 108.6 (CH2), 88.9 (CH), 72.5 (CH), 54.0 (CH3), 37.7 (C), 24.4 (CH2), 23.1 (CH3), 17.6 (CH3), 16.5 (CH3), –2.1 (CH3), –3.0 (CH3). MS (EI): 281 (4, [M–CH3]+), 207 (7), 159 (22), 152 (75), 149 (36), 137 (21), 107 (15), 91 (36), 89 (29), 77 (34), 75 (72), 71 (21), 69 (100), 43 (28), 41 (44). HRMS (EI) calcd for C16H28O3Si (M+): 296.1808, found: 296.1810.

**Intramolecular Hydrosilylation Reactions. General Procedure 2 (GP 2).** In a pressure stable glass tube, silyl ether and di-*t*-butyl hyponitrite (TBHN)6 were dissolved in hexane. After flushing with argon, the tube was sealed and heated to 80–85 °C. After cooling to –78 °C, the tube was opened and the reaction mixture was treated with phenyl lithium. The mixture was allowed to warm to RT and was stirred at this temperature for 1 h. After hydrolysation with sat. NH4Cl, the org. phase was separated, washed with brine and dried (MgSO4). The solvent was evaporated *in vacuo* and the crude product was purified by FC. The diastereoisomeric ratio of the products was determined by GC on the crude reaction mixtures.

**3-(Dimethylphenylsilyl)-1-propanol (10).** According to *GP 2* with silylether **5** (268 mg, 1.0 mmol), TBHN (52 mg, 0.3 mmol) and phenyllithium (0.66 ml, 1.65m in cyclohexane/diethyl ether 7:3, 1.1 mmol) in pentane (4 ml) for 3 h. FC (pentane/diethyl ether, 4:1) afforded **10** (92.7 mg, 47%) as a colorless oil. The spectral data are in agreement with those reported in the literature.7

**4-(Dimethylphenylsilyl)-2-butanol (11).** According to *GP 2* with silylether **6** (250 mg, 0.91 mmol), TBHN (48 mg, 0.28 mmol) and phenyllithium (1.14 ml, 1.55m in cyclohexane/diethyl ether 7:3, 1.76 mmol) in pentane (3 ml) for 3 h. After cooling to 0 °C, additional TBHN (42 mg, 0.24 mmol) was added and the mixture was stirred for another 3 h at 80-85 °C. FC (pentane/diethyl ether, 5:1) afforded **11** (82 mg, 43%) as a colorless oil. The spectral data are in agreement with those reported in the literature.8

**4-(Dimethylphenylsilyl)-2-pentanol (12).** According to *GP 2* with silylether **7** (526 mg, 1.8 mmol), TBHN (124 mg, 0.71 mmol) and phenyllithium (1.2 ml, 1.65m in cyclohexane/diethyl ether 7:3, 1.95 mmol) in pentane (6 ml) for 3 h. FC (pentane/diethyl ether, 6:1) and distillation (bulb-to-bulb, 100 mbar, *ca.* 150 °C) afforded **12** (77.3 mg, 20%) as a colorless oil. dr (*u:l*) = 2.0:1. The spectral data are in agreement with those reported in the literature.8,9

**4-(Dimethylphenylsilyl)-3-methyl-2-butanol (13).** According to *GP 2* with silylether **8** (296 mg, 1.0 mmol), TBHN (52 mg, 0.3 mmol) and phenyllithium (0.79 ml, 1.4m in cyclohexane/diethyl ether 7:3, 1.1 mmol) in hexane (4 ml) for 4 h. FC (pentane/diethylether 6:1) afforded **13** (30 mg, 14%) as a colorless oil. dr = 1:1. IR (nujol): 3376*br. m*, 2965*s*, 2931*s*, 2899*m*, 1427*m*, 1248*s*, 1113*s*, 1082*m*, 887*m*, 833*s*, 727*m*, 700*m* cm-1. 1H-NMR (200 MHz, CDCl3): both diastereoisomers: ** = 7.55–7.50 (*m*, 2 aromat. H); 7.36–7.34 (*m*, 3 aromat. H); 3.64–3.49 (*m*, 1 H, C*H*OH), 1.69–1.59 (*m*, 1 H, C*H*–CH2Si), 1.43 (*br. s*, 1 H, OH), 1.09 (*d*, *J* = 6.3 Hz, 3 H, CH3, isomer A), 1.08 (*d*, *J* = 6.3 Hz, 3 H, CH3, isomer B), 0.99–0.93 (*m*, 1 H, CH2), 0.85 (*d*, *J* = 7.0 Hz, 3 H, CH3, isomer B), 0.84 (*d*, *J* = 6.6 Hz, 3 H, CH3, isomer A), 0.66–0.53 (*m*, 1 H, CH2), 0.31 (*s*, 6 H, Si(CH3)2). 13C-NMR (50 MHz, CDCl3): both diastereoisomers: ** = 139.7 (C), 133.5 (CH), 128.8 (CH), 127.8 (CH), 73.5 (CH), 73.1 (CH), 36.4 (CH), 36.2 (CH), 19.3 (CH3), 19.1 (CH3), 18.9 (CH3), 18.8 (CH3), 17.7 (CH2), 17.3 (CH2), –2.0 (CH3), –2.3 (CH3). MS (EI): 145 (7), 143 (10), 137 (44), 136 (12), 135 (100), 75 (54), 43 (9), 40 (16).

**3-((Propargyloxy)dimethylsilyl)-2,4-dimethoxy-3-methyl-1,4-cyclohexadiene (14).**

According to *GP 1* with dichloromethane (5 ml), aminosilane **4** (0.64 ml, 2.2 mmol), propargyl alcohol (0.13 ml, 2.2 mmol) and methyl trifluorsulfonate (0.25 ml, 2.2 mmol) for 20 min at 0 °C. FC (pentane/diethyl ether, 30:1) afforded **14** (292 mg, 50%) as a colorless oil. IR (nujol): 2958*m*, 1595*m*, 1475*m*, 1255*s*, 1128*s*, 1095*s*, 850*m*,805*m*,768*m* cm-1. 1H-NMR (200 MHz, CDCl3): ** = 4.58 (*t*, *J* = 3.5 Hz, 2 H, C=CH), 4.29 (*d*, *J* = 2.2 Hz, 2 H, OCH2), 3.51 (*s*, 6 H, OCH3), 2.85 (*t*, *J* = 3.5 Hz, 2 H, CH2), 2.36 (*t*, *J* = 2.4 Hz, 1 H, CC–H), 1.34 (*s*, 3 H, C–CH3), 0.16 (*s*, 6 H, Si(CH3)2). 13C-NMR (75 MHz, CDCl3): ** = 157.0 (C), 89.3 (CH), 82.5 (C), 72.4 (CH), 54.1 (CH3), 51.5 (CH2), 37.5 (C), 24.4 (CH2), 16.8 (CH3), –3.0 (CH3). MS (EI): 266 (11, [M]+), 251 (9), 195 (15), 152 (97), 122 (100), 121 (54), 107 (88), 99 (25), 91 (38), 89 (31), 83 (51). HRMS (EI) calcd for C14H22O3Si (M+): 266.1338, found: 266.1330.

**(*Z*)-3-Dimethylphenylsilyl-2-propen-1-ol (15).** According to *GP 2* with silylether **14** (233 mg, 0.88 mmol), TBHN (46 mg, 0.26 mmol) and phenyllithium (0.69 ml, 1.4m in cyclohexane/diethyl ether 7:3, 0.96 mmol) in pentane (4 ml) for 3 h. FC (pentane/diethyl ether 5:1) afforded **15** (93 mg, 55%) as a colorless oil. IR (nujol): 3441*br. m*, 2957*s*, 2361*m*, 1607*w*, 1427*w*, 1250*m*, 1111*s*, 1044*m*, 822*s*, 781*m*, 731*m*, 700*m* cm-1. 1H-NMR (200 MHz, CDCl3): ** = 7.57–7.52 (*m*, 2 aromat. H), 7.39–7.33 (*m*, 3 aromat. H), 6.56 (*dt*, *J1* = 14.3 Hz, *J2* = 6.3 Hz, 1 H, CH2CH=C*H*), 5.86 (*dt*, *J1* = 14.3 Hz, *J2* = 1.3 Hz, 1 H, CH2C*H*=CH), 4.07 (*dd*, *J1* = 6.3 Hz, *J2* = 1.3 Hz, 2 H, CH2), 0.40 (*s*, 6 H, Si(CH3)2). 13C-NMR (75 MHz, CDCl3): ** = 148.0 (CH), 139.1 (C), 133.5 (CH), 129.9 (CH), 129.1 (CH), 128.0 (CH), 63.3 (CH2), –0.9 (CH3). MS (EI): 177 (49, [M–CH3]+), 160 (40), 159 (100), 137 (30), 135 (30), 131 (21), 115 (31), 99 (61), 61 (61). HRMS (EI) calcd for C10H13OSi ([M–CH3]+): 177.0736, found: 177.0731.

**1-(*tert*-Butyldimethylsilyl)-2-(*tert*-butyldimethylsilyloxy)-propene (17).** In a pressure stable glass tube, 3-(*tert*-butyldimethylsilyloxy)-propyne (**16**)10 (170 mg, 1 mmol), Si-reagent **1** (402 mg, 1.5 mmol) and AIBN (49 mg, 0.3 mmol) were dissolved in hexane (4 ml). After flushing with Ar, the tube was sealed and heated to 80–85 °C for 4.5 h. The solvent was evaporated *in vacuo*. FC (pentane) afforded **17** (105 mg, 38%) as a colorless oil. dr (*Z:E*) = 1:1. IR (nujol): 2953*s*, 2930*s*, 2886*m*, 2857*s*, 1472*m*, 1462*m*, 1254*s*, 1096*s*, 835*s*, 810*s*, 775*s* cm-1. 1H-NMR (200 MHz, CDCl3): ** = 6.45 (*dt*, *J1* = 14.7 Hz, *J2* = 6.0 Hz, 1 H, *Z*-isomer, CH2–C*H*=CH), 6.11 (*dt*, *J1* = 18.8 Hz, *J2* = 3.6 Hz, *E*-isomer, CH2–C*H*=CH), 5.90 (*dt*, *J1* = 18.7 Hz, *J2* = 1.6 Hz, *E*-isomer, CH2–CH=C*H*), 5.59 (*dt*, *J1* = 14.7 Hz, *J2* = 1.6 Hz, *Z*-isomer, CH2–CH=C*H*), 4.24–4.20 (*m*, 2 H, CH2), 0.92 (*s*, 9 H, C(CH3)3), 0.90 (*s*, 9 H, C(CH3)3), 0.88 (*s*, 9 H, C(CH3)3), 0.87 (*s*, 9 H, C(CH3)3), 0.08 (*s*, 6 H, Si(CH3)2), 0.07 (2*s*, 12 H, Si(CH3)2), 0.02 (*s*, 6 H, Si(CH3)2). 13C-NMR (75 MHz, CDCl3): both isomers: ** = 149.2 (CH), 146.5 (CH), 126.7 (CH), 125.3 (CH), 65.9 (CH2), 63.9 (CH2), 26.4 (CH3), 26.3 (CH3), 26.0 (CH3), 25.9 (CH3), –4.3 (CH3), –5.1 (CH3), –5.2 (CH3), –6.1 (CH3). MS (EI): 229 (6), 187 (10), 173 (21), 147 (17), 134 (14), 133 (79), 73 (100), 40 (17). HRMS (EI) calcd for C11H25OSi2 ([M–C(CH3)3]+): 229.1444, found: 229.1437.

**References**

1. S. Amrein, A. Timmermann, A. Studer, *Org. Lett.,* 2001, **3**, 2357.
2. E. Piers, J. R. Grierson, *J. Org. Chem.*, 1977, **42**, 3755.
3. K. Tamao, E. Nakajo, Y. Ito, *Tetrahedron*, 1988, **44**, 3997.
4. E. R. Alexander, R. W. Kluiber, *J. Am. Chem. Soc.,* 1951, **73**, 4304.
5. N. Feeder, G. Hutton, A. Nelson, S. Warren, *J. Chem. Soc., Perkin Trans. 1*, 1999, 3413.
6. G. D. Mendenhall, *Tetrahedron Lett.,* 1983, **24**, 451.
7. T. Nakashima, R. Fujiyama, H.-J. Kim, M. Fujio, Y. Tsuno, *Bull. Chem. Soc. Jpn.,* 2000, **73**, 429.
8. I. Fleming, N. J. Lawrence, *J. Chem. Soc., Perkin Trans. 1*, 1992, 3309.
9. A. Barbero, D. C. Blakemore, I. Fleming, R. N. Wesley, *J. Chem. Soc. Perkin Trans. 1,* 1997, 1329; M. Lautens, C. H. Zhang, B. J. Goh, C. M. Crudden, M. J. A. Johnson, *J. Org. Chem*., 1994, **59**,6208.
10. Y. Araki, T. Konoike, *J. Org. Chem.,* 1997, **62**, 5299.
